# Supplementary material for: Absorption cross sections for the Ã2A″ (0,90,0) ← X2A′ (0,01,0) band of the HCO radical
Source: Royal Society of Chemistry journal article supplement (doi:10.1039/b607185f), 2006-01-01
Supplement: b607185f.pdf [file b607185f.pdf]

wl\_air cross\_section

|         |          |
|---------|----------|
| 613.77  | 6.80E-19 |
| 613.772 | 7.07E-19 |
| 613.774 | 7.43E-19 |
| 613.776 | 8.13E-19 |
| 613.778 | 8.55E-19 |
| 613.78  | 8.82E-19 |
| 613.782 | 9.93E-19 |
| 613.784 | 1.12E-18 |
| 613.786 | 1.14E-18 |
| 613.788 | 1.29E-18 |
| 613.79  | 1.40E-18 |
| 613.792 | 1.57E-18 |
| 613.794 | 1.74E-18 |
| 613.796 | 1.97E-18 |
| 613.798 | 2.17E-18 |
| 613.8   | 2.46E-18 |
| 613.802 | 2.66E-18 |
| 613.804 | 2.88E-18 |
| 613.806 | 3.37E-18 |
| 613.808 | 3.61E-18 |
| 613.81  | 3.66E-18 |
| 613.812 | 4.05E-18 |
| 613.814 | 3.86E-18 |
| 613.816 | 3.97E-18 |
| 613.818 | 3.88E-18 |
| 613.82  | 3.69E-18 |
| 613.822 | 3.57E-18 |
| 613.824 | 3.45E-18 |
| 613.826 | 3.40E-18 |
| 613.828 | 3.31E-18 |
| 613.83  | 3.31E-18 |
| 613.832 | 3.28E-18 |
| 613.834 | 3.17E-18 |
| 613.836 | 2.99E-18 |
| 613.838 | 2.75E-18 |
| 613.84  | 2.44E-18 |
| 613.842 | 2.50E-18 |
| 613.844 | 2.46E-18 |
| 613.846 | 2.31E-18 |
| 613.848 | 2.45E-18 |
| 613.85  | 2.41E-18 |
| 613.852 | 2.46E-18 |
| 613.854 | 2.46E-18 |
| 613.856 | 2.50E-18 |
| 613.858 | 2.58E-18 |
| 613.86  | 2.50E-18 |
| 613.862 | 2.25E-18 |
| 613.864 | 2.11E-18 |
| 613.866 | 1.97E-18 |
| 613.868 | 1.73E-18 |
| 613.87  | 1.68E-18 |
| 613.872 | 1.53E-18 |
| 613.874 | 1.55E-18 |
| 613.876 | 1.44E-18 |
| 613.878 | 1.53E-18 |
| 613.88  | 1.65E-18 |
| 613.882 | 1.59E-18 |
| 613.884 | 1.70E-18 |
| 613.886 | 1.84E-18 |

ESI\_cross\_sections\_vs\_wl.txt

613.888 1.96E-18  
613.89 2.04E-18  
613.892 2.08E-18  
613.894 1.99E-18  
613.896 1.87E-18  
613.898 1.65E-18  
613.9 1.49E-18  
613.902 1.33E-18  
613.904 1.29E-18  
613.906 1.12E-18  
613.908 1.16E-18  
613.91 1.13E-18  
613.912 1.05E-18  
613.914 1.09E-18  
613.916 1.11E-18  
613.918 1.11E-18  
613.92 1.09E-18  
613.922 1.21E-18  
613.924 1.32E-18  
613.926 1.37E-18  
613.928 1.53E-18  
613.93 1.66E-18  
613.932 1.78E-18  
613.934 1.73E-18  
613.936 1.70E-18  
613.938 1.53E-18  
613.94 1.34E-18  
613.942 1.18E-18  
613.944 1.10E-18  
613.946 9.79E-19  
613.948 9.51E-19  
613.95 8.33E-19  
613.952 8.05E-19  
613.954 7.93E-19  
613.956 7.42E-19  
613.958 7.23E-19  
613.96 7.73E-19  
613.962 7.71E-19  
613.964 8.07E-19  
613.966 7.97E-19  
613.968 8.34E-19  
613.97 9.20E-19  
613.972 9.97E-19  
613.974 1.08E-18  
613.976 1.21E-18  
613.978 1.32E-18  
613.98 1.36E-18  
613.982 1.56E-18  
613.984 1.50E-18  
613.986 1.53E-18  
613.988 1.40E-18  
613.99 1.21E-18  
613.992 1.04E-18  
613.994 8.79E-19  
613.996 8.24E-19  
613.998 7.61E-19  
614 6.83E-19  
614.002 6.36E-19  
614.004 6.13E-19  
614.006 6.05E-19  
614.008 5.75E-19  
614.01 5.54E-19  
614.012 5.30E-19

ESI\_cross\_sections\_vs\_wl.txt

614.014 5.24E-19  
614.016 5.15E-19  
614.018 5.54E-19  
614.02 5.21E-19  
614.022 6.07E-19  
614.024 6.07E-19  
614.026 6.23E-19  
614.028 6.72E-19  
614.03 7.27E-19  
614.032 7.95E-19  
614.034 8.69E-19  
614.036 1.01E-18  
614.038 1.11E-18  
614.04 1.18E-18  
614.042 1.29E-18  
614.044 1.29E-18  
614.046 1.32E-18  
614.048 1.10E-18  
614.05 9.78E-19  
614.052 8.69E-19  
614.054 7.96E-19  
614.056 6.78E-19  
614.058 6.36E-19  
614.06 5.93E-19  
614.062 5.10E-19  
614.064 4.93E-19  
614.066 4.78E-19  
614.068 4.51E-19  
614.07 4.36E-19  
614.072 4.37E-19  
614.074 4.47E-19  
614.076 4.19E-19  
614.078 4.20E-19  
614.08 4.19E-19  
614.082 4.30E-19  
614.084 4.12E-19  
614.086 4.15E-19  
614.088 4.54E-19  
614.09 4.55E-19  
614.092 4.72E-19  
614.094 4.99E-19  
614.096 5.01E-19  
614.098 5.97E-19  
614.1 6.41E-19  
614.102 7.50E-19  
614.104 8.20E-19  
614.106 9.20E-19  
614.108 1.01E-18  
614.11 1.06E-18  
614.112 1.07E-18  
614.114 9.79E-19  
614.116 8.71E-19  
614.118 7.77E-19  
614.12 7.13E-19  
614.122 6.51E-19  
614.124 6.09E-19  
614.126 5.67E-19  
614.128 5.04E-19  
614.13 4.97E-19  
614.132 4.70E-19  
614.134 4.55E-19  
614.136 4.11E-19  
614.138 3.92E-19

ESI\_cross\_sections\_vs\_wl.txt

614.14 3.91E-19  
614.142 4.23E-19  
614.144 4.08E-19  
614.146 3.50E-19  
614.148 3.71E-19  
614.15 3.65E-19  
614.152 3.40E-19  
614.154 3.47E-19  
614.156 3.52E-19  
614.158 3.60E-19  
614.16 3.56E-19  
614.162 3.83E-19  
614.164 3.56E-19  
614.166 3.69E-19  
614.168 3.87E-19  
614.17 4.08E-19  
614.172 4.38E-19  
614.174 4.68E-19  
614.176 5.10E-19  
614.178 5.91E-19  
614.18 6.65E-19  
614.182 6.79E-19  
614.184 7.27E-19  
614.186 7.69E-19  
614.188 7.77E-19  
614.19 7.84E-19  
614.192 6.69E-19  
614.194 5.87E-19  
614.196 5.41E-19  
614.198 4.99E-19  
614.2 4.90E-19  
614.202 4.50E-19  
614.204 4.23E-19  
614.206 4.20E-19  
614.208 3.96E-19  
614.21 4.21E-19  
614.212 3.96E-19  
614.214 3.65E-19  
614.216 3.65E-19  
614.218 3.38E-19  
614.22 3.28E-19  
614.222 3.31E-19  
614.224 3.29E-19  
614.226 3.14E-19  
614.228 3.00E-19  
614.23 2.93E-19  
614.232 2.92E-19  
614.234 2.78E-19  
614.236 2.88E-19  
614.238 2.85E-19  
614.24 2.68E-19  
614.242 2.85E-19  
614.244 2.89E-19  
614.246 2.97E-19  
614.248 2.80E-19  
614.25 2.95E-19  
614.252 2.96E-19  
614.254 3.12E-19  
614.256 3.42E-19  
614.258 3.63E-19  
614.26 3.75E-19  
614.262 3.83E-19  
614.264 3.94E-19

ESI\_cross\_sections\_vs\_wl.txt

614.266 4.47E-19  
614.268 4.57E-19  
614.27 5.87E-19  
614.272 6.16E-19  
614.274 6.32E-19  
614.276 6.28E-19  
614.278 5.89E-19  
614.28 5.38E-19  
614.282 5.20E-19  
614.284 4.87E-19  
614.286 4.54E-19  
614.288 4.44E-19  
614.29 4.37E-19  
614.292 4.41E-19  
614.294 4.26E-19  
614.296 4.29E-19  
614.298 4.17E-19  
614.3 4.33E-19  
614.302 4.44E-19  
614.304 4.35E-19  
614.306 4.16E-19  
614.308 4.14E-19  
614.31 4.09E-19  
614.312 4.07E-19  
614.314 3.76E-19  
614.316 3.84E-19  
614.318 3.86E-19  
614.32 3.77E-19  
614.322 3.57E-19  
614.324 3.44E-19  
614.326 3.40E-19  
614.328 3.31E-19  
614.33 3.39E-19  
614.332 3.41E-19  
614.334 3.38E-19  
614.336 2.96E-19  
614.338 3.10E-19  
614.34 3.38E-19  
614.342 3.01E-19  
614.344 3.26E-19  
614.346 3.04E-19  
614.348 3.27E-19  
614.35 3.20E-19  
614.352 3.13E-19  
614.354 3.14E-19  
614.356 3.26E-19  
614.358 3.15E-19  
614.36 3.40E-19  
614.362 3.08E-19  
614.364 3.25E-19  
614.366 3.30E-19  
614.368 3.18E-19  
614.37 3.33E-19  
614.372 3.42E-19  
614.374 3.51E-19  
614.376 3.66E-19  
614.378 3.56E-19  
614.38 3.66E-19  
614.382 3.80E-19  
614.384 3.70E-19  
614.386 3.80E-19  
614.388 3.99E-19  
614.39 4.00E-19

ESI\_cross\_sections\_vs\_wl.txt

614.392 4.04E-19  
614.394 4.24E-19  
614.396 4.34E-19  
614.398 4.46E-19  
614.4 4.19E-19  
614.402 4.37E-19  
614.404 4.45E-19  
614.406 4.35E-19  
614.408 4.23E-19  
614.41 4.24E-19  
614.412 4.04E-19  
614.414 3.81E-19  
614.416 4.02E-19  
614.418 4.07E-19  
614.42 3.88E-19  
614.422 4.06E-19  
614.424 3.80E-19  
614.426 4.05E-19  
614.428 4.36E-19  
614.43 4.21E-19  
614.432 4.47E-19  
614.434 4.48E-19  
614.436 4.66E-19  
614.438 4.45E-19  
614.44 4.59E-19  
614.442 4.67E-19  
614.444 4.93E-19  
614.446 5.05E-19  
614.448 5.41E-19  
614.45 5.56E-19  
614.452 6.06E-19  
614.454 6.60E-19  
614.456 7.04E-19  
614.458 8.01E-19  
614.46 8.53E-19  
614.462 9.48E-19  
614.464 1.02E-18  
614.466 1.16E-18  
614.468 1.33E-18  
614.47 1.46E-18  
614.472 1.60E-18  
614.474 1.79E-18  
614.476 2.03E-18  
614.478 2.34E-18  
614.48 2.49E-18  
614.482 2.73E-18  
614.484 2.76E-18  
614.486 2.93E-18  
614.488 3.01E-18  
614.49 2.94E-18  
614.492 3.14E-18  
614.494 3.11E-18  
614.496 3.19E-18  
614.498 3.59E-18  
614.5 3.46E-18  
614.502 3.42E-18  
614.504 3.36E-18  
614.506 3.22E-18  
614.508 3.02E-18  
614.51 2.91E-18  
614.512 2.85E-18  
614.514 3.00E-18  
614.516 3.34E-18

ESI\_cross\_sections\_vs\_wl.txt

614.518 3.45E-18  
614.52 3.44E-18  
614.522 3.57E-18  
614.524 3.42E-18  
614.526 3.13E-18  
614.528 2.82E-18  
614.53 2.60E-18  
614.532 2.41E-18  
614.534 2.44E-18  
614.536 2.45E-18  
614.538 2.83E-18  
614.54 2.94E-18  
614.542 3.19E-18  
614.544 3.37E-18  
614.546 3.59E-18  
614.548 3.45E-18  
614.55 3.30E-18  
614.552 2.89E-18  
614.554 2.69E-18  
614.556 2.41E-18  
614.558 2.26E-18  
614.56 2.08E-18  
614.562 2.11E-18  
614.564 2.16E-18  
614.566 2.37E-18  
614.568 2.53E-18  
614.57 2.80E-18  
614.572 3.19E-18  
614.574 3.52E-18  
614.576 3.58E-18  
614.578 3.65E-18  
614.58 3.66E-18  
614.582 3.22E-18  
614.584 2.98E-18  
614.586 2.82E-18  
614.588 2.47E-18  
614.59 2.19E-18  
614.592 1.99E-18  
614.594 2.04E-18  
614.596 1.94E-18  
614.598 2.09E-18  
614.6 2.03E-18  
614.602 2.34E-18  
614.604 2.55E-18  
614.606 2.80E-18  
614.608 3.08E-18  
614.61 3.21E-18  
614.612 3.15E-18  
614.614 3.03E-18  
614.616 2.78E-18  
614.618 2.51E-18  
614.62 2.24E-18  
614.622 1.99E-18  
614.624 1.76E-18  
614.626 1.69E-18  
614.628 1.53E-18  
614.63 1.45E-18  
614.632 1.65E-18  
614.634 1.57E-18  
614.636 1.56E-18  
614.638 1.74E-18  
614.64 1.88E-18  
614.642 2.00E-18

ESI\_cross\_sections\_vs\_wl.txt

614.644 2.28E-18  
614.646 2.44E-18  
614.648 2.87E-18  
614.65 2.98E-18  
614.652 3.08E-18  
614.654 2.91E-18  
614.656 2.63E-18  
614.658 2.44E-18  
614.66 2.22E-18  
614.662 1.93E-18  
614.664 1.76E-18  
614.666 1.59E-18  
614.668 1.46E-18  
614.67 1.43E-18  
614.672 1.40E-18  
614.674 1.37E-18  
614.676 1.37E-18  
614.678 1.50E-18  
614.68 1.56E-18  
614.682 1.62E-18  
614.684 1.82E-18  
614.686 1.94E-18  
614.688 2.20E-18  
614.69 2.53E-18  
614.692 2.69E-18  
614.694 3.16E-18  
614.696 3.31E-18  
614.698 3.28E-18  
614.7 3.21E-18  
614.702 3.00E-18  
614.704 2.70E-18  
614.706 2.38E-18  
614.708 2.15E-18  
614.71 1.91E-18  
614.712 1.76E-18  
614.714 1.55E-18  
614.716 1.47E-18  
614.718 1.39E-18  
614.72 1.35E-18  
614.722 1.23E-18  
614.724 1.24E-18  
614.726 1.30E-18  
614.728 1.28E-18  
614.73 1.37E-18  
614.732 1.45E-18  
614.734 1.61E-18  
614.736 1.76E-18  
614.738 1.99E-18  
614.74 2.20E-18  
614.742 2.45E-18  
614.744 2.53E-18  
614.746 2.71E-18  
614.748 2.67E-18  
614.75 2.42E-18  
614.752 2.32E-18  
614.754 2.10E-18  
614.756 1.81E-18  
614.758 1.65E-18  
614.76 1.48E-18  
614.762 1.34E-18  
614.764 1.29E-18  
614.766 1.20E-18  
614.768 1.16E-18



ESI\_cross\_sections\_vs\_wl.txt

614.77 1.07E-18  
614.772 1.06E-18  
614.774 1.06E-18  
614.776 1.03E-18  
614.778 1.09E-18  
614.78 1.11E-18  
614.782 1.12E-18  
614.784 1.22E-18  
614.786 1.27E-18  
614.788 1.40E-18  
614.79 1.57E-18  
614.792 1.87E-18  
614.794 1.98E-18  
614.796 2.27E-18  
614.798 2.55E-18  
614.8 2.60E-18  
614.802 2.60E-18  
614.804 2.68E-18  
614.806 2.57E-18  
614.808 2.39E-18  
614.81 2.20E-18  
614.812 2.04E-18  
614.814 2.00E-18  
614.816 1.90E-18  
614.818 1.83E-18  
614.82 1.84E-18  
614.822 1.95E-18  
614.824 2.08E-18  
614.826 2.20E-18  
614.828 2.25E-18  
614.83 2.07E-18  
614.832 2.12E-18  
614.834 1.97E-18  
614.836 1.76E-18  
614.838 1.65E-18  
614.84 1.50E-18  
614.842 1.51E-18  
614.844 1.54E-18  
614.846 1.54E-18  
614.848 1.55E-18  
614.85 1.63E-18  
614.852 1.82E-18  
614.854 1.88E-18  
614.856 2.12E-18  
614.858 2.34E-18  
614.86 2.47E-18  
614.862 2.26E-18  
614.864 2.31E-18  
614.866 2.13E-18  
614.868 1.85E-18  
614.87 1.74E-18  
614.872 1.60E-18  
614.874 1.48E-18  
614.876 1.30E-18  
614.878 1.19E-18  
614.88 1.16E-18  
614.882 1.02E-18  
614.884 1.06E-18  
614.886 9.76E-19  
614.888 9.44E-19  
614.89 9.00E-19  
614.892 9.14E-19  
614.894 9.11E-19

ESI\_cross\_sections\_vs\_wl.txt

614.896 9.24E-19  
614.898 9.30E-19  
614.9 9.04E-19  
614.902 9.66E-19  
614.904 9.91E-19  
614.906 1.07E-18  
614.908 1.13E-18  
614.91 1.14E-18  
614.912 1.24E-18  
614.914 1.34E-18  
614.916 1.50E-18  
614.918 1.56E-18  
614.92 1.71E-18  
614.922 1.83E-18  
614.924 2.01E-18  
614.926 2.05E-18  
614.928 2.02E-18  
614.93 2.03E-18  
614.932 1.89E-18  
614.934 1.72E-18  
614.936 1.64E-18  
614.938 1.52E-18  
614.94 1.42E-18  
614.942 1.31E-18  
614.944 1.34E-18  
614.946 1.27E-18  
614.948 1.23E-18  
614.95 1.23E-18  
614.952 1.25E-18  
614.954 1.29E-18  
614.956 1.40E-18  
614.958 1.50E-18  
614.96 1.67E-18  
614.962 1.93E-18  
614.964 2.02E-18  
614.966 2.20E-18  
614.968 2.22E-18  
614.97 2.22E-18  
614.972 2.03E-18  
614.974 1.85E-18  
614.976 1.67E-18  
614.978 1.61E-18  
614.98 1.50E-18  
614.982 1.55E-18  
614.984 1.60E-18  
614.986 1.62E-18  
614.988 1.64E-18  
614.99 1.69E-18  
614.992 1.68E-18  
614.994 1.69E-18  
614.996 1.75E-18  
614.998 1.72E-18  
615 1.58E-18  
615.002 1.45E-18  
615.004 1.40E-18  
615.006 1.38E-18  
615.008 1.24E-18  
615.01 1.16E-18  
615.012 1.11E-18  
615.014 1.06E-18  
615.016 9.43E-19  
615.018 8.61E-19  
615.02 8.91E-19

ESI\_cross\_sections\_vs\_wl.txt

615.022 8.83E-19  
615.024 8.46E-19  
615.026 7.69E-19  
615.028 7.67E-19  
615.03 7.80E-19  
615.032 7.30E-19  
615.034 7.68E-19  
615.036 7.17E-19  
615.038 7.53E-19  
615.04 7.69E-19  
615.042 7.79E-19  
615.044 7.90E-19  
615.046 8.26E-19  
615.048 8.52E-19  
615.05 9.31E-19  
615.052 9.38E-19  
615.054 1.01E-18  
615.056 1.04E-18  
615.058 1.11E-18  
615.06 1.12E-18  
615.062 1.27E-18  
615.064 1.29E-18  
615.066 1.35E-18  
615.068 1.35E-18  
615.07 1.40E-18  
615.072 1.35E-18  
615.074 1.31E-18  
615.076 1.27E-18  
615.078 1.27E-18  
615.08 1.19E-18  
615.082 1.13E-18  
615.084 1.16E-18  
615.086 1.13E-18  
615.088 1.04E-18  
615.09 1.09E-18  
615.092 1.05E-18  
615.094 1.04E-18  
615.096 1.09E-18  
615.098 1.04E-18  
615.1 1.18E-18  
615.102 1.20E-18  
615.104 1.30E-18  
615.106 1.41E-18  
615.108 1.67E-18  
615.11 1.85E-18  
615.112 1.99E-18  
615.114 1.92E-18  
615.116 1.99E-18  
615.118 1.90E-18  
615.12 1.74E-18  
615.122 1.55E-18  
615.124 1.41E-18  
615.126 1.36E-18  
615.128 1.24E-18  
615.13 1.13E-18  
615.132 1.15E-18  
615.134 1.18E-18  
615.136 1.14E-18  
615.138 1.14E-18  
615.14 1.16E-18  
615.142 1.18E-18  
615.144 1.15E-18  
615.146 1.13E-18

ESI\_cross\_sections\_vs\_wl.txt

615.148 1.16E-18  
615.15 1.11E-18  
615.152 1.12E-18  
615.154 1.07E-18  
615.156 1.01E-18  
615.158 9.50E-19  
615.16 9.33E-19  
615.162 8.89E-19  
615.164 8.35E-19  
615.166 7.85E-19  
615.168 7.89E-19  
615.17 7.12E-19  
615.172 7.43E-19  
615.174 7.38E-19  
615.176 6.86E-19  
615.178 6.98E-19  
615.18 6.96E-19  
615.182 6.45E-19  
615.184 6.53E-19  
615.186 6.91E-19  
615.188 6.57E-19  
615.19 6.72E-19  
615.192 6.58E-19  
615.194 6.49E-19  
615.196 6.78E-19  
615.198 6.97E-19  
615.2 6.99E-19  
615.202 7.12E-19  
615.204 7.45E-19  
615.206 7.45E-19  
615.208 7.51E-19  
615.21 7.71E-19  
615.212 7.82E-19  
615.214 8.11E-19  
615.216 8.63E-19  
615.218 8.35E-19  
615.22 8.61E-19  
615.222 9.06E-19  
615.224 9.33E-19  
615.226 9.73E-19  
615.228 9.53E-19  
615.23 9.74E-19  
615.232 1.00E-18  
615.234 1.01E-18  
615.236 9.67E-19  
615.238 9.96E-19  
615.24 9.84E-19  
615.242 9.79E-19  
615.244 1.01E-18  
615.246 9.47E-19  
615.248 1.01E-18  
615.25 1.01E-18  
615.252 1.08E-18  
615.254 1.20E-18  
615.256 1.26E-18  
615.258 1.41E-18  
615.26 1.53E-18  
615.262 1.68E-18  
615.264 1.91E-18  
615.266 1.99E-18  
615.268 1.92E-18  
615.27 1.89E-18  
615.272 1.69E-18

ESI\_cross\_sections\_vs\_wl.txt

615.274 1.53E-18  
615.276 1.23E-18  
615.278 1.17E-18  
615.28 1.06E-18  
615.282 9.56E-19  
615.284 9.23E-19  
615.286 8.79E-19  
615.288 8.23E-19  
615.29 8.35E-19  
615.292 7.99E-19  
615.294 8.17E-19  
615.296 8.00E-19  
615.298 7.46E-19  
615.3 7.83E-19  
615.302 7.92E-19  
615.304 8.32E-19  
615.306 8.29E-19  
615.308 7.73E-19  
615.31 7.88E-19  
615.312 8.18E-19  
615.314 7.88E-19  
615.316 7.78E-19  
615.318 8.02E-19  
615.32 7.89E-19  
615.322 7.63E-19  
615.324 7.36E-19  
615.326 7.68E-19  
615.328 7.55E-19  
615.33 6.92E-19  
615.332 6.89E-19  
615.334 6.69E-19  
615.336 6.56E-19  
615.338 6.37E-19  
615.34 6.35E-19  
615.342 6.14E-19  
615.344 5.90E-19  
615.346 5.94E-19  
615.348 5.96E-19  
615.35 5.98E-19  
615.352 6.12E-19  
615.354 5.66E-19  
615.356 6.26E-19  
615.358 6.22E-19  
615.36 5.92E-19  
615.362 6.10E-19  
615.364 6.27E-19  
615.366 6.11E-19  
615.368 6.28E-19  
615.37 6.02E-19  
615.372 5.94E-19  
615.374 6.19E-19  
615.376 5.96E-19  
615.378 6.04E-19  
615.38 6.14E-19  
615.382 6.38E-19  
615.384 6.38E-19  
615.386 6.13E-19  
615.388 6.52E-19  
615.39 6.88E-19  
615.392 7.16E-19  
615.394 7.44E-19  
615.396 7.36E-19  
615.398 7.50E-19

ESI\_cross\_sections\_vs\_wl.txt

615.4 7.70E-19  
615.402 8.07E-19  
615.404 8.32E-19  
615.406 8.56E-19  
615.408 8.99E-19  
615.41 9.22E-19  
615.412 9.72E-19  
615.414 1.05E-18  
615.416 1.18E-18  
615.418 1.21E-18  
615.42 1.36E-18  
615.422 1.60E-18  
615.424 1.66E-18  
615.426 1.79E-18  
615.428 1.97E-18  
615.43 1.80E-18  
615.432 1.77E-18  
615.434 1.66E-18  
615.436 1.37E-18  
615.438 1.21E-18  
615.44 1.08E-18  
615.442 1.00E-18  
615.444 9.13E-19  
615.446 8.53E-19  
615.448 8.18E-19  
615.45 7.53E-19  
615.452 6.87E-19  
615.454 6.56E-19  
615.456 6.55E-19  
615.458 6.45E-19  
615.46 6.46E-19  
615.462 6.05E-19  
615.464 6.14E-19  
615.466 6.13E-19  
615.468 6.06E-19  
615.47 5.81E-19  
615.472 5.95E-19  
615.474 6.30E-19  
615.476 6.47E-19  
615.478 6.30E-19  
615.48 5.99E-19  
615.482 6.27E-19  
615.484 6.07E-19  
615.486 6.34E-19  
615.488 6.15E-19  
615.49 6.18E-19  
615.492 5.96E-19  
615.494 6.14E-19  
615.496 6.01E-19  
615.498 5.73E-19  
615.5 5.91E-19  
615.502 5.69E-19  
615.504 5.72E-19  
615.506 5.64E-19  
615.508 5.81E-19  
615.51 5.80E-19  
615.512 5.34E-19  
615.514 5.62E-19  
615.516 5.48E-19  
615.518 5.42E-19  
615.52 5.58E-19  
615.522 5.23E-19  
615.524 5.62E-19

ESI\_cross\_sections\_vs\_wl.txt

615.526 5.23E-19  
615.528 5.33E-19  
615.53 5.24E-19  
615.532 5.62E-19  
615.534 5.21E-19  
615.536 5.38E-19  
615.538 5.24E-19  
615.54 5.33E-19  
615.542 5.45E-19  
615.544 5.16E-19  
615.546 5.48E-19  
615.548 5.35E-19  
615.55 5.74E-19  
615.552 5.00E-19  
615.554 5.55E-19  
615.556 5.65E-19  
615.558 5.68E-19  
615.56 6.00E-19  
615.562 5.78E-19  
615.564 5.64E-19  
615.566 6.08E-19  
615.568 5.95E-19  
615.57 6.19E-19  
615.572 6.49E-19  
615.574 6.37E-19  
615.576 6.66E-19  
615.578 7.03E-19  
615.58 7.65E-19  
615.582 8.03E-19  
615.584 8.39E-19  
615.586 9.17E-19  
615.588 9.75E-19  
615.59 1.13E-18  
615.592 1.27E-18  
615.594 1.47E-18  
615.596 1.67E-18  
615.598 1.75E-18  
615.6 1.98E-18  
615.602 1.85E-18  
615.604 1.72E-18  
615.606 1.57E-18  
615.608 1.40E-18  
615.61 1.20E-18  
615.612 1.13E-18  
615.614 9.92E-19  
615.616 9.25E-19  
615.618 8.25E-19  
615.62 7.36E-19  
615.622 7.04E-19  
615.624 6.88E-19  
615.626 6.45E-19  
615.628 6.02E-19  
615.63 6.06E-19  
615.632 5.83E-19  
615.634 5.49E-19  
615.636 6.12E-19  
615.638 5.69E-19  
615.64 5.35E-19  
615.642 5.67E-19  
615.644 5.47E-19  
615.646 5.63E-19  
615.648 5.61E-19  
615.65 5.18E-19

ESI\_cross\_sections\_vs\_wl.txt

615.652 5.16E-19  
615.654 5.03E-19  
615.656 5.25E-19  
615.658 5.32E-19  
615.66 5.16E-19  
615.662 5.28E-19  
615.664 5.11E-19  
615.666 4.94E-19  
615.668 5.39E-19  
615.67 4.84E-19  
615.672 5.14E-19  
615.674 5.01E-19  
615.676 5.03E-19  
615.678 4.86E-19  
615.68 5.06E-19  
615.682 5.12E-19  
615.684 4.88E-19  
615.686 5.17E-19  
615.688 5.05E-19  
615.69 4.96E-19  
615.692 4.94E-19  
615.694 5.10E-19  
615.696 5.23E-19  
615.698 5.13E-19  
615.7 4.93E-19  
615.702 5.17E-19  
615.704 4.94E-19  
615.706 5.21E-19  
615.708 5.31E-19  
615.71 5.03E-19  
615.712 5.10E-19  
615.714 5.07E-19  
615.716 5.08E-19  
615.718 5.33E-19  
615.72 5.15E-19  
615.722 5.13E-19  
615.724 5.18E-19  
615.726 4.73E-19  
615.728 5.06E-19  
615.73 5.57E-19  
615.732 5.33E-19  
615.734 5.20E-19  
615.736 5.29E-19  
615.738 5.53E-19  
615.74 5.24E-19  
615.742 5.49E-19  
615.744 5.90E-19  
615.746 5.85E-19  
615.748 6.04E-19  
615.75 5.89E-19  
615.752 6.03E-19  
615.754 6.37E-19  
615.756 6.25E-19  
615.758 6.55E-19  
615.76 7.06E-19  
615.762 7.26E-19  
615.764 7.92E-19  
615.766 7.99E-19  
615.768 8.52E-19  
615.77 1.05E-18  
615.772 1.10E-18  
615.774 1.27E-18  
615.776 1.48E-18



ESI\_cross\_sections\_vs\_wl.txt

|         |          |
|---------|----------|
| 615.778 | 1.62E-18 |
| 615.78  | 1.75E-18 |
| 615.782 | 1.75E-18 |
| 615.784 | 1.70E-18 |
| 615.786 | 1.57E-18 |
| 615.788 | 1.50E-18 |
| 615.79  | 1.27E-18 |
| 615.792 | 1.15E-18 |
| 615.794 | 1.04E-18 |
| 615.796 | 9.52E-19 |
| 615.798 | 8.00E-19 |
| 615.8   | 7.58E-19 |
| 615.802 | 7.21E-19 |
| 615.804 | 7.01E-19 |
| 615.806 | 6.64E-19 |
| 615.808 | 6.23E-19 |
| 615.81  | 6.05E-19 |
| 615.812 | 5.68E-19 |
| 615.814 | 5.46E-19 |
| 615.816 | 5.72E-19 |
| 615.818 | 5.57E-19 |
| 615.82  | 5.71E-19 |
| 615.822 | 5.18E-19 |
| 615.824 | 5.59E-19 |
| 615.826 | 5.25E-19 |
| 615.828 | 5.34E-19 |
| 615.83  | 5.30E-19 |
